# Supplementary material
Source: publisher site journal article supplement (https://www.dovepress.com/article/577930)
Supplement: Supplementary file 1 [file 577930_supplementary%20materials_2.pdf]

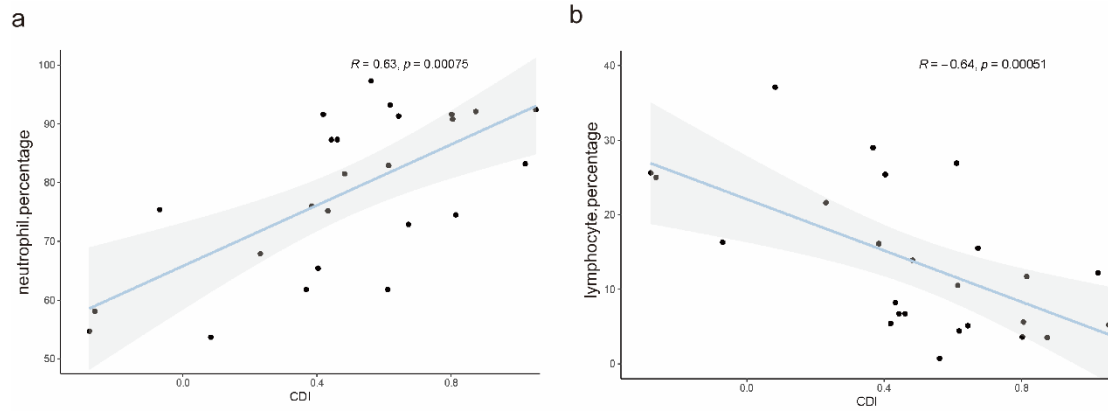

**Fig. S1** Correlation analysis of CDI with neutrophil percentage and lymphocyte percentage in clinical samples. **(a)** Scatter plot of correlation between CDI and neutrophil percentage. **(b)** Scatter plot of correlation between CDI and lymphocyte percentage.

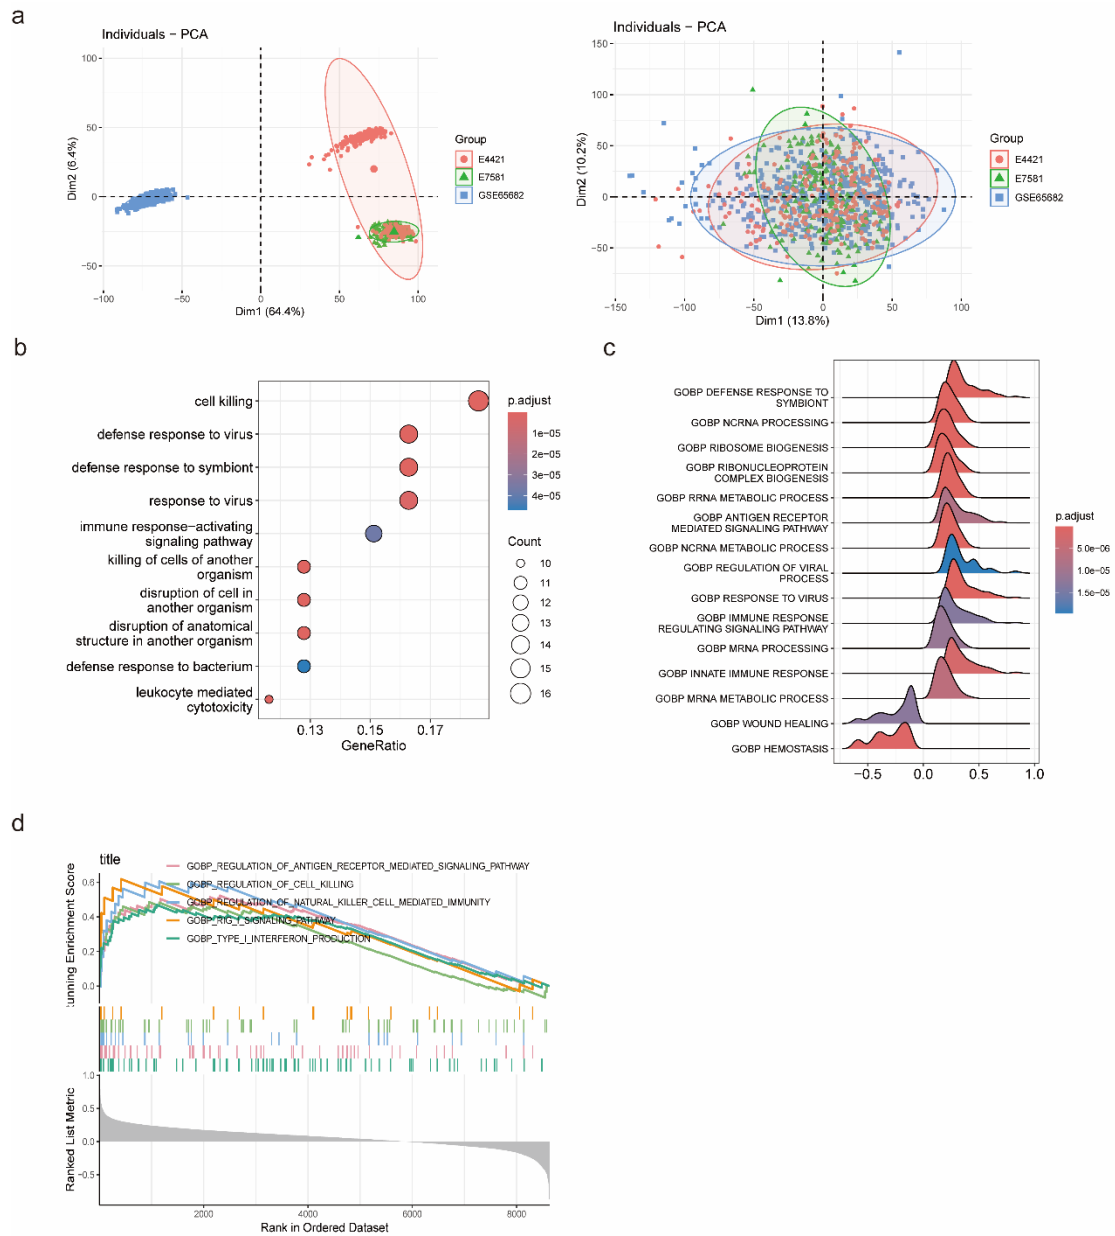

**Fig. S2** Transcriptome data merging and enrichment analysis. **(a)** Principal component analysis (PCA) on GSE65682, E-MTAB-4421 and E-MTAB-7581 datasets before and after elimination of batch effect. **(b)** The enrichment analysis identified the top 10 GOBP terms enriched in transcriptome presented by bubble plot. **(c)** GSEA analysis identified the top 15 GO terms enriched in in transcriptome presented by ridge plot. **(d)** GSEA analysis identified the GO terms enriched in high CDI group.

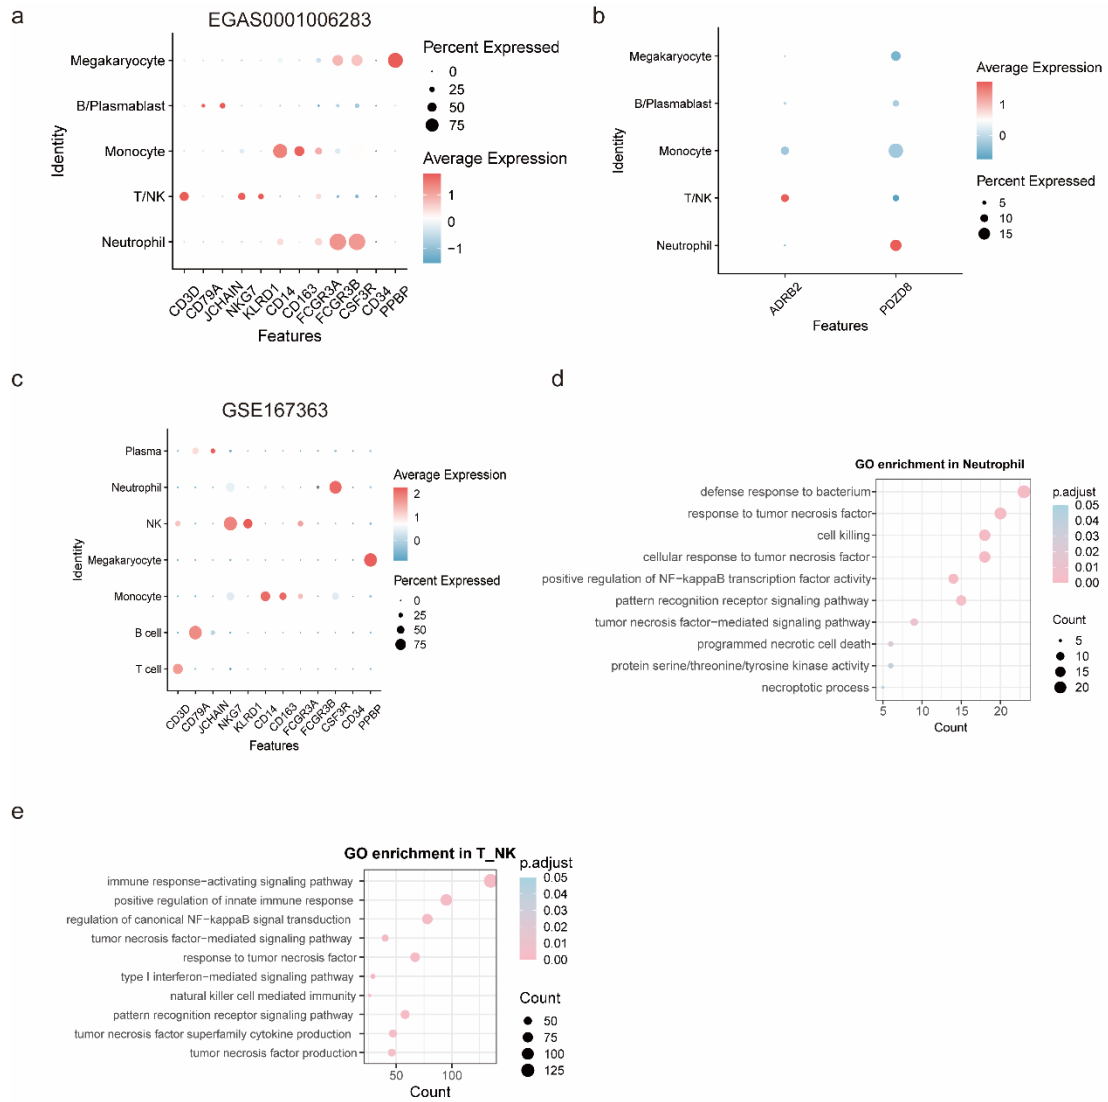

**Fig. S3** Single-cell transcriptome annotation and enrichment analysis. **(a)** The dot plot showed a classical marker expressed in megakaryocyte, B/plasmablast, monocyte, T/NK, and neutrophil clusters in EGAS0001006283 scRNA-seq data. **(b)** The bubble plot showed two key genes expressed in different cell clusters. **(c)** The dot plot showed a classical marker expressed in T cell, B cell, Monocyte, Megakaryocyte, NK, Neutrophil, Plasma clusters in GSE167363 scRNA-seq data. **(d)** The GO enrichment analysis identified biological progress items in neutrophil presented by bubble plot in EGAS0001006283 scRNA-seq data. **(e)** The GO enrichment analysis identified biological progress items in T/NK presented by bubble plot in EGAS0001006283 scRNA-seq data.

**Table. S1** Result of Univariate COX regression analysis.

| Gene     | HR          | L95CI       | H95CI       | pvalue      |
|----------|-------------|-------------|-------------|-------------|
| ZSCAN2   | 0.596400655 | 0.415217041 | 0.856645337 | 0.005150571 |
| ZNF783   | 0.719222863 | 0.545534258 | 0.948210893 | 0.019436787 |
| ZNF689   | 0.444074991 | 0.264789053 | 0.744753589 | 0.00209054  |
| ZNF614   | 0.663298767 | 0.456927472 | 0.962877658 | 0.030857989 |
| ZNF514   | 0.709911392 | 0.553938275 | 0.909802062 | 0.006794204 |
| ZNF428   | 0.43478127  | 0.237121356 | 0.797206778 | 0.007088584 |
| ZNF362   | 0.56501065  | 0.359277056 | 0.888553916 | 0.013455509 |
| ZNF324   | 0.633644852 | 0.415420702 | 0.966504068 | 0.034164395 |
| ZNF212   | 0.512674022 | 0.323681898 | 0.8120153   | 0.004407129 |
| ZFY      | 0.566263249 | 0.331510877 | 0.967250516 | 0.037355352 |
| XRCC6    | 0.577845221 | 0.336410847 | 0.992551525 | 0.046916737 |
| VPS52    | 0.294194119 | 0.125591135 | 0.689142432 | 0.004844034 |
| VPS13B   | 0.633840179 | 0.408849735 | 0.982643102 | 0.041526499 |
| UVRAG    | 0.581426833 | 0.338561208 | 0.998511212 | 0.049372139 |
| UTP6     | 0.52472649  | 0.28916469  | 0.952183649 | 0.033911242 |
| USP10    | 1.48952455  | 1.007082932 | 2.203079124 | 0.046009368 |
| URM1     | 0.407344324 | 0.188577368 | 0.879900913 | 0.022279132 |
| UBXN2B   | 1.853514833 | 1.103532426 | 3.113200079 | 0.019684191 |
| UBQLN2   | 2.323561798 | 1.225667517 | 4.404897211 | 0.0097803   |
| UBE4A    | 1.890415358 | 1.0466975   | 3.414234034 | 0.034748073 |
| UBE2R2   | 1.65635748  | 1.054567369 | 2.601559826 | 0.028480085 |
| UBE2Q1   | 0.325343314 | 0.132114789 | 0.801184128 | 0.014604404 |
| UBE2F    | 1.644872587 | 1.054513    | 2.565739662 | 0.028237935 |
| UBE2C    | 1.371454606 | 1.056711932 | 1.779943689 | 0.017565033 |
| UBAP1    | 1.694709254 | 1.001283398 | 2.86835821  | 0.049444222 |
| TTYH2    | 0.77146764  | 0.608303097 | 0.978397648 | 0.0323468   |
| TTLL3    | 2.294913502 | 1.272995844 | 4.13719181  | 0.005732173 |
| TTC31    | 0.543150279 | 0.358395777 | 0.823146488 | 0.004008813 |
| TTC17    | 0.518073639 | 0.268848812 | 0.998331716 | 0.0494197   |
| TSPAN32  | 0.523564734 | 0.308350256 | 0.888989144 | 0.016593773 |
| TSPAN3   | 0.778089505 | 0.607904731 | 0.995918023 | 0.046322331 |
| TROAP    | 1.457561328 | 1.049841218 | 2.023625086 | 0.024417572 |
| TRMT1    | 0.488844661 | 0.287271711 | 0.831857414 | 0.008322877 |
| TRIT1    | 0.662328464 | 0.482854511 | 0.908511743 | 0.010619292 |
| TRIP12   | 3.113884884 | 1.550070818 | 6.255378117 | 0.00141557  |
| TRIM44   | 0.618918861 | 0.408639824 | 0.937403881 | 0.023503594 |
| TRIM25   | 1.774104942 | 1.111111877 | 2.832701559 | 0.016338113 |
| TRAPPC4  | 0.318428864 | 0.121358015 | 0.835519116 | 0.020067745 |
| TOP2A    | 1.148868007 | 1.005161082 | 1.313120573 | 0.041803826 |
| TNFRSF1A | 2.205623795 | 1.096047428 | 4.438472461 | 0.026622707 |
| TMEM42   | 0.47612136  | 0.245044744 | 0.92510268  | 0.028547503 |
| TMEM138  | 0.592191326 | 0.419418767 | 0.836134658 | 0.002912781 |

---

|          |             |             |             |             |
|----------|-------------|-------------|-------------|-------------|
| TLR8     | 1.460038564 | 1.002384788 | 2.126641022 | 0.048566514 |
| TLR7     | 0.814386971 | 0.681769418 | 0.972801245 | 0.02357192  |
| TLR5     | 1.542844841 | 1.064221456 | 2.236724501 | 0.022111264 |
| TGFA     | 1.81552487  | 1.221424153 | 2.698596179 | 0.003187631 |
| TEX264   | 0.570358046 | 0.382679118 | 0.850081139 | 0.005821242 |
| TERF2    | 0.411176755 | 0.179650018 | 0.941087156 | 0.035405378 |
| TCTN1    | 0.662455843 | 0.449223042 | 0.976903907 | 0.037721405 |
| TCP11L2  | 1.588956448 | 1.161169432 | 2.174344693 | 0.003807062 |
| TBX1     | 0.621537784 | 0.390738391 | 0.988664607 | 0.044632414 |
| TBC1D14  | 1.776454612 | 1.035177873 | 3.048549501 | 0.037029462 |
| TAF15    | 0.494225241 | 0.267496001 | 0.913129869 | 0.024442049 |
| SYNE1    | 3.25969505  | 1.790913894 | 5.933066828 | 0.000110195 |
| STX11    | 2.107457911 | 1.339285585 | 3.31622986  | 0.00126871  |
| STK25    | 0.459652582 | 0.28455315  | 0.742499235 | 0.001488968 |
| STAT5B   | 2.524649756 | 1.307068256 | 4.876452598 | 0.005829347 |
| SSH2     | 2.279510162 | 1.205340426 | 4.310953543 | 0.011263146 |
| SRP68    | 0.520743077 | 0.301418441 | 0.89965747  | 0.019334659 |
| SPI1     | 2.188695574 | 1.177504778 | 4.068253825 | 0.013264852 |
| SP6      | 1.933228889 | 1.050721152 | 3.55696079  | 0.034089635 |
| SNX29    | 0.599283701 | 0.371876006 | 0.965754576 | 0.035457921 |
| SNX11    | 2.261644635 | 1.012017108 | 5.054298409 | 0.04669249  |
| SNRNP200 | 0.514413512 | 0.296688822 | 0.891915172 | 0.017917148 |
| SMAD3    | 0.617367123 | 0.39324625  | 0.969220088 | 0.036098041 |
| SLC46A2  | 0.77466709  | 0.60892803  | 0.985517287 | 0.037641326 |
| SLC37A2  | 0.712467405 | 0.528100839 | 0.961198629 | 0.026487526 |
| SLC35A5  | 2.25889677  | 1.197987056 | 4.259323663 | 0.011795579 |
| SLC25A44 | 2.189687937 | 1.109931574 | 4.31984581  | 0.023770295 |
| SLC12A6  | 1.838836674 | 1.085262701 | 3.115669884 | 0.023568659 |
| SIVA1    | 0.476857157 | 0.292538823 | 0.777307935 | 0.002973474 |
| SIRPA    | 2.202874511 | 1.036905287 | 4.679941527 | 0.039953605 |
| SIGMAR1  | 0.64951515  | 0.434451752 | 0.97103977  | 0.03544872  |
| SIDT1    | 0.652084105 | 0.436221671 | 0.974765143 | 0.037108423 |
| SIAH2    | 1.688847478 | 1.225050153 | 2.328235947 | 0.001378658 |
| SH3GLB1  | 1.731489168 | 1.108245813 | 2.705225415 | 0.015890461 |
| SERPINE2 | 1.406048113 | 1.073153829 | 1.842206813 | 0.013431151 |
| SERF1A   | 0.670485054 | 0.465486395 | 0.965764441 | 0.031788249 |
| SEPLG    | 1.736122812 | 1.054719084 | 2.85774901  | 0.030046649 |
| SEC23IP  | 0.528766209 | 0.315824405 | 0.885282135 | 0.015377379 |
| SCYL2    | 3.059030354 | 1.594445974 | 5.868914256 | 0.000770163 |
| SCRIB    | 1.844434461 | 1.022505115 | 3.327062556 | 0.041960982 |
| S100A6   | 2.250178556 | 1.112930032 | 4.549525475 | 0.023955635 |
| S100A11  | 1.627264963 | 1.053044384 | 2.514605556 | 0.028327143 |
| RUNX3    | 0.741966358 | 0.563432144 | 0.977072539 | 0.03357666  |
| RTF1     | 1.768976515 | 1.094831535 | 2.858227783 | 0.019802824 |

---

---

|          |             |             |             |             |
|----------|-------------|-------------|-------------|-------------|
| RSPH3    | 1.91846795  | 1.220528754 | 3.015512142 | 0.004748215 |
| RRP8     | 0.437821887 | 0.236937487 | 0.809023539 | 0.008377988 |
| RPUSD4   | 0.649940057 | 0.444305933 | 0.950745975 | 0.02640351  |
| RPS6KA4  | 0.662163572 | 0.442419478 | 0.991051746 | 0.045107398 |
| RPL9     | 0.607838898 | 0.37880828  | 0.975343322 | 0.039070791 |
| ROGDI    | 1.302094539 | 1.010294202 | 1.678174718 | 0.041442511 |
| RNF5     | 0.49479728  | 0.302642415 | 0.808955838 | 0.005027933 |
| RNF44    | 2.072695301 | 1.041663136 | 4.124237157 | 0.037871562 |
| RNF25    | 0.488936156 | 0.265351849 | 0.900911622 | 0.021756312 |
| RNF220   | 0.404283533 | 0.220374745 | 0.741669262 | 0.003441505 |
| RNF149   | 2.273602107 | 1.116818806 | 4.628563302 | 0.023538512 |
| RNF135   | 1.748130193 | 1.003708753 | 3.044667253 | 0.04849092  |
| RNF125   | 0.593933095 | 0.395297729 | 0.892381856 | 0.012138018 |
| RFTN1    | 0.786294588 | 0.631688485 | 0.978740619 | 0.031370929 |
| RC3H2    | 2.267532611 | 1.011628462 | 5.082601302 | 0.046807424 |
| RBM4B    | 0.491303438 | 0.308504153 | 0.782417565 | 0.002758401 |
| RASSF1   | 0.705868317 | 0.524514427 | 0.949926362 | 0.021503746 |
| RAP1GAP2 | 2.35128322  | 1.210532801 | 4.56702435  | 0.011602394 |
| RAC2     | 3.11485178  | 1.244658447 | 7.795151861 | 0.015199648 |
| RABEP1   | 0.533333019 | 0.332321351 | 0.855930889 | 0.009200308 |
| R3HCC1   | 0.334836875 | 0.133660242 | 0.838811388 | 0.019538289 |
| PYGL     | 2.112534192 | 1.228279094 | 3.633376759 | 0.006869123 |
| PUF60    | 0.446245471 | 0.244788977 | 0.813496679 | 0.00844589  |
| PTTG1IP  | 2.907182944 | 1.110351934 | 7.611742196 | 0.029771371 |
| PTPRO    | 0.645855671 | 0.444901916 | 0.937576426 | 0.021509944 |
| PTCD1    | 0.589856782 | 0.374469645 | 0.92913011  | 0.022783763 |
| PSMG2    | 0.547549483 | 0.309688424 | 0.968103465 | 0.038316685 |
| PSMB3    | 2.139851957 | 1.097876775 | 4.17074712  | 0.025469524 |
| PRTN3    | 1.158440527 | 1.039330034 | 1.291201458 | 0.007888069 |
| PRPF8    | 0.372331482 | 0.184757916 | 0.75033717  | 0.005721079 |
| PRPF38B  | 2.118434964 | 1.03662596  | 4.329205395 | 0.039531714 |
| PRPF31   | 0.545504367 | 0.335663854 | 0.886526838 | 0.014441281 |
| PRKCD    | 2.676449554 | 1.116983051 | 6.413152113 | 0.027237513 |
| PRC1     | 1.217687967 | 1.011490442 | 1.465919918 | 0.03746512  |
| PPP1CB   | 2.065479777 | 1.079468566 | 3.952136122 | 0.028456434 |
| POM121   | 1.616862512 | 1.00526796  | 2.600544818 | 0.047520314 |
| POLR3E   | 0.732252481 | 0.540712768 | 0.991642379 | 0.043987468 |
| POC5     | 0.327735361 | 0.141357075 | 0.759852076 | 0.009320745 |
| POC1B    | 2.42562361  | 1.276734783 | 4.608357174 | 0.006808702 |
| PMPCB    | 0.365199005 | 0.182020858 | 0.732719945 | 0.004577905 |
| PLSCR3   | 0.603347474 | 0.3871537   | 0.940267843 | 0.025611903 |
| PLOD1    | 1.664337408 | 1.025155823 | 2.702046798 | 0.039355382 |
| PLCL2    | 2.750284822 | 1.183126082 | 6.39328869  | 0.018739048 |
| PIGQ     | 0.550956018 | 0.315406457 | 0.962416992 | 0.036209399 |

---

---

|         |             |             |             |             |
|---------|-------------|-------------|-------------|-------------|
| PIAS2   | 1.452611124 | 1.033928604 | 2.040836348 | 0.031373281 |
| PHKA2   | 1.779587473 | 1.017076842 | 3.113758413 | 0.043457541 |
| PHF21A  | 3.206799537 | 1.569877008 | 6.550553466 | 0.001386271 |
| PDZD8   | 2.384487358 | 1.424493657 | 3.9914393   | 0.000946164 |
| PARP9   | 1.452533768 | 1.019114143 | 2.070282669 | 0.038953106 |
| PAK2    | 2.312962633 | 1.130039719 | 4.734166466 | 0.021762534 |
| PAFAH2  | 0.629492035 | 0.435478392 | 0.909942329 | 0.013817979 |
| PABPC1L | 1.975698959 | 1.12799892  | 3.460452228 | 0.017258419 |
| P4HA1   | 1.726786438 | 1.16931239  | 2.550038319 | 0.006026251 |
| OSBPL8  | 1.670111714 | 1.085194713 | 2.570297389 | 0.019719094 |
| OLAH    | 1.172177194 | 1.039417213 | 1.321893996 | 0.009588192 |
| OCEL1   | 0.559654372 | 0.340639681 | 0.91948482  | 0.021944159 |
| OAZ1    | 1.603976749 | 1.041082478 | 2.471217666 | 0.032150756 |
| NUP85   | 0.556714738 | 0.318660475 | 0.97260666  | 0.039634523 |
| NUP214  | 2.001721329 | 1.064669554 | 3.763504146 | 0.031200838 |
| NUP133  | 0.403814448 | 0.197246829 | 0.826710924 | 0.013118919 |
| NUMB    | 3.273182291 | 1.526476514 | 7.018596236 | 0.002313405 |
| NQO2    | 1.510011638 | 1.114758219 | 2.045407794 | 0.007777535 |
| NONO    | 0.211845929 | 0.073312907 | 0.612152746 | 0.004150969 |
| NOL6    | 0.683955547 | 0.477274979 | 0.98013768  | 0.038522601 |
| NME3    | 0.568763227 | 0.392642915 | 0.823882454 | 0.002839346 |
| NISCH   | 0.541527761 | 0.314316546 | 0.932984025 | 0.027112922 |
| NFKB1   | 2.476740774 | 1.053207097 | 5.824348201 | 0.037637113 |
| NFE2L2  | 1.99087029  | 1.138710009 | 3.480749692 | 0.015706316 |
| NEIL2   | 0.663557923 | 0.45745555  | 0.962517819 | 0.030673892 |
| NBEAL2  | 2.030208023 | 1.183676105 | 3.482155805 | 0.010095211 |
| NAGPA   | 0.763188582 | 0.605565383 | 0.961839675 | 0.022044906 |
| N4BP2L2 | 2.373351228 | 1.3984001   | 4.028028923 | 0.001362735 |
| MZF1    | 0.549028941 | 0.31213788  | 0.965703932 | 0.037425964 |
| MYO9A   | 0.609145249 | 0.417058975 | 0.889701354 | 0.010328997 |
| MYD88   | 2.100038616 | 1.100345234 | 4.007980452 | 0.024452867 |
| MXD3    | 1.529429295 | 1.008425293 | 2.319610572 | 0.04556021  |
| MXD1    | 2.34963978  | 1.027597444 | 5.372538756 | 0.042920807 |
| MRPL43  | 0.557995668 | 0.325541697 | 0.956434057 | 0.0338395   |
| MPV17   | 0.644210724 | 0.431323921 | 0.962171207 | 0.031684441 |
| MPO     | 1.19031475  | 1.049394842 | 1.350158346 | 0.006730026 |
| MPEG1   | 0.668993369 | 0.456499326 | 0.980400412 | 0.039257808 |
| MMRN1   | 1.31880345  | 1.043012489 | 1.667518422 | 0.020789786 |
| MGMT    | 0.690911316 | 0.516432962 | 0.924337683 | 0.012782928 |
| MEFV    | 1.672376478 | 1.025209964 | 2.728068574 | 0.039428709 |
| MED29   | 0.308640715 | 0.125236591 | 0.760633052 | 0.01063408  |
| MED12   | 1.841139719 | 1.028500312 | 3.295862361 | 0.039922066 |
| MAGOH   | 0.537732323 | 0.293564523 | 0.984982957 | 0.04454127  |
| MAEA    | 2.339465209 | 1.138233565 | 4.808413344 | 0.020766302 |

---

---

|          |             |             |             |             |
|----------|-------------|-------------|-------------|-------------|
| MAD1L1   | 0.604807231 | 0.383896571 | 0.952839422 | 0.030137988 |
| M6PR     | 0.551599796 | 0.332608417 | 0.914776415 | 0.021161468 |
| LZTR1    | 0.588901994 | 0.361089415 | 0.960442329 | 0.033863598 |
| LRRC47   | 0.489727839 | 0.260476106 | 0.920749932 | 0.02667171  |
| LRP10    | 2.280894778 | 1.142784131 | 4.552461701 | 0.019362439 |
| LPAR2    | 1.647913061 | 1.006308042 | 2.698594606 | 0.047149794 |
| LMNB1    | 1.52516384  | 1.037833304 | 2.2413279   | 0.031632125 |
| LITAF    | 3.212227833 | 1.371536544 | 7.523246605 | 0.007197454 |
| LIMK2    | 1.366156797 | 1.006971792 | 1.85346244  | 0.045005597 |
| LILRB3   | 2.311620641 | 1.187594299 | 4.499507948 | 0.013666212 |
| LFNG     | 0.626578824 | 0.396129253 | 0.991093235 | 0.04569436  |
| LETMD1   | 0.565846913 | 0.355783272 | 0.899937558 | 0.016158996 |
| LDLR     | 1.334420123 | 1.028915541 | 1.730634823 | 0.029641076 |
| KLHL6    | 1.771632709 | 1.114143788 | 2.817125123 | 0.015661558 |
| KIF5C    | 0.576092219 | 0.369911153 | 0.89719448  | 0.01469059  |
| KIF1B    | 1.566237569 | 1.025006607 | 2.393252984 | 0.03806604  |
| KIAA2026 | 0.507229357 | 0.285160188 | 0.902235415 | 0.020883281 |
| KIAA0040 | 2.02516121  | 1.204849046 | 3.403976573 | 0.00773745  |
| KDM2A    | 4.089534137 | 1.705396247 | 9.806688319 | 0.00159867  |
| KBTBD2   | 3.348556373 | 1.496462294 | 7.492891624 | 0.003272626 |
| ITGAX    | 1.653251234 | 1.01698366  | 2.687594453 | 0.042570969 |
| ITGAM    | 2.026878327 | 1.25400924  | 3.276080925 | 0.003927814 |
| ITFG2    | 0.709638566 | 0.533646064 | 0.943672087 | 0.018342021 |
| IQGAP1   | 2.525414055 | 1.44613225  | 4.410188726 | 0.001126659 |
| INTS9    | 0.370402778 | 0.186790107 | 0.734504737 | 0.004464338 |
| INTS10   | 0.469182731 | 0.221054973 | 0.995826657 | 0.048740411 |
| IMP3     | 0.610772815 | 0.410231524 | 0.909348525 | 0.015185575 |
| IL4R     | 1.380944551 | 1.068545133 | 1.784676935 | 0.013639524 |
| IL1R2    | 1.374731089 | 1.05001395  | 1.799867105 | 0.020615596 |
| IL1B     | 1.370994203 | 1.005020407 | 1.870235758 | 0.046418033 |
| IL11RA   | 0.6166355   | 0.403628194 | 0.942053468 | 0.025349146 |
| IGSF6    | 1.574353666 | 1.008968839 | 2.456557    | 0.045576142 |
| IFT57    | 0.674500722 | 0.46812007  | 0.971868656 | 0.034593569 |
| IFNGR2   | 2.466404701 | 1.119438254 | 5.434111373 | 0.025096944 |
| IFITM3   | 1.262547168 | 1.005748093 | 1.584915112 | 0.044498426 |
| IFITM1   | 1.681496548 | 1.096712911 | 2.578095517 | 0.017156119 |
| IFFO2    | 0.574130486 | 0.391852371 | 0.841198981 | 0.004409408 |
| IFFO1    | 0.694340984 | 0.488533978 | 0.986849275 | 0.041975044 |
| IDH3B    | 0.254284245 | 0.119145987 | 0.542699579 | 0.00039993  |
| HVCN1    | 0.777245119 | 0.636405599 | 0.949253081 | 0.013490846 |
| HTATIP2  | 2.281477051 | 1.253829244 | 4.151392671 | 0.006921864 |
| HSPA1L   | 2.127474914 | 1.134692622 | 3.988877186 | 0.018573901 |
| HPS6     | 0.532937106 | 0.286067631 | 0.992848992 | 0.047415271 |
| HMMR     | 1.215907215 | 1.015953126 | 1.455215126 | 0.032955536 |

---

---

|           |             |             |             |             |
|-----------|-------------|-------------|-------------|-------------|
| HMGB2     | 1.813876588 | 1.151354736 | 2.857632121 | 0.010237346 |
| HLA.DRA   | 0.590162906 | 0.38425945  | 0.906398672 | 0.016001935 |
| HLA.DPA1  | 0.741344503 | 0.608855784 | 0.902663137 | 0.002888081 |
| HLA.DMB   | 0.790589751 | 0.655866303 | 0.952987143 | 0.013695617 |
| HLA.DMA   | 0.723006114 | 0.550177207 | 0.950126313 | 0.019963992 |
| HIF1AN    | 0.42669059  | 0.199794486 | 0.911260683 | 0.02780689  |
| HIF1A     | 1.61851298  | 1.15176639  | 2.274405894 | 0.005537543 |
| HCK       | 1.878132418 | 1.059952563 | 3.327867211 | 0.030815201 |
| HAUS7     | 0.668499411 | 0.487144099 | 0.917370165 | 0.012628306 |
| GRAMD1A   | 1.971264828 | 1.21934019  | 3.186875208 | 0.005621166 |
| GPSTM1    | 0.610910118 | 0.394130105 | 0.946923787 | 0.027534529 |
| GNPTAB    | 0.504705463 | 0.300108675 | 0.848784544 | 0.009933969 |
| GNAI3     | 1.749588796 | 1.09221598  | 2.802615062 | 0.019971071 |
| GMPT2     | 2.372489243 | 1.096530694 | 5.13319439  | 0.02823663  |
| GGH       | 1.464962888 | 1.05286508  | 2.038358288 | 0.023473728 |
| GEMIN5    | 0.463765454 | 0.260600009 | 0.825319988 | 0.008980734 |
| GBP2      | 1.715375771 | 1.117205955 | 2.633815208 | 0.013642185 |
| GATA3     | 0.484067306 | 0.297292334 | 0.788184322 | 0.003535218 |
| GALNT11   | 0.44688933  | 0.225996723 | 0.883685703 | 0.020589116 |
| FYCO1     | 0.35031882  | 0.201276847 | 0.609723758 | 0.000207427 |
| FURIN     | 1.683611731 | 1.036606171 | 2.734450689 | 0.035269081 |
| FOSL2     | 1.808627551 | 1.051319825 | 3.111454324 | 0.032292915 |
| FLOT2     | 1.795076023 | 1.001840585 | 3.216377911 | 0.049281993 |
| FKBP15    | 1.921864569 | 1.084503247 | 3.405765203 | 0.025231159 |
| FCGR2A    | 2.608962588 | 1.462311468 | 4.654744174 | 0.001168317 |
| FBXO21    | 0.633468162 | 0.434233453 | 0.92411561  | 0.017809019 |
| FBXL5     | 2.149649784 | 1.180659929 | 3.913907875 | 0.012309101 |
| FBXL16    | 0.630344099 | 0.40551563  | 0.979823349 | 0.040312595 |
| FAM50B    | 0.704354207 | 0.5339662   | 0.929112833 | 0.013127177 |
| FAM117B   | 0.778385453 | 0.632362359 | 0.958127733 | 0.018103814 |
| F5        | 1.403590069 | 1.017826592 | 1.935560632 | 0.038665532 |
| EVI2B     | 1.710006336 | 1.071744066 | 2.728376821 | 0.024409174 |
| ESYT1     | 0.689472931 | 0.487786167 | 0.974551874 | 0.03520756  |
| ERCC5     | 0.494664254 | 0.267439881 | 0.914944786 | 0.024879885 |
| ELF4      | 2.826449966 | 1.256681754 | 6.357074406 | 0.011990177 |
| ELANE     | 1.187652235 | 1.051539608 | 1.341383453 | 0.005619972 |
| EIF4G2    | 7.097106567 | 2.206075087 | 22.83191625 | 0.001012153 |
| EIF4ENIF1 | 0.455811978 | 0.2548343   | 0.815292758 | 0.008089944 |
| EIF3G     | 0.635037266 | 0.417443023 | 0.966053584 | 0.03389595  |
| EFEMP2    | 1.517411359 | 1.136019439 | 2.026846683 | 0.004751132 |
| DYNLT1    | 1.885464411 | 1.052842172 | 3.376551721 | 0.032910605 |
| DYNC1H1   | 0.562085023 | 0.333552417 | 0.947196172 | 0.030486509 |
| DUSP18    | 1.975133894 | 1.059142039 | 3.683315133 | 0.03229987  |
| DRG2      | 0.560465974 | 0.316477917 | 0.992556168 | 0.047079147 |

---

---

|          |             |             |             |             |
|----------|-------------|-------------|-------------|-------------|
| DNPEP    | 0.61786027  | 0.419804593 | 0.90935478  | 0.01461224  |
| DNAJC17  | 0.490870607 | 0.270961548 | 0.889255151 | 0.01891971  |
| DHX33    | 0.335398724 | 0.178880369 | 0.628868916 | 0.000658789 |
| DHX30    | 0.563014796 | 0.39712928  | 0.798192619 | 0.001256792 |
| DHRS4L2  | 0.729160568 | 0.573438413 | 0.927170419 | 0.009969856 |
| DHRS4    | 0.65408602  | 0.474095247 | 0.902410485 | 0.009728716 |
| DGKQ     | 0.709342596 | 0.516614344 | 0.973970088 | 0.033752748 |
| DGCR6    | 0.556890896 | 0.339729195 | 0.912866701 | 0.020259612 |
| DFFA     | 0.746732076 | 0.579945937 | 0.961484094 | 0.023542416 |
| DENND5A  | 2.621093973 | 1.223458837 | 5.615336948 | 0.013183339 |
| DEFA4    | 1.170976581 | 1.040642343 | 1.317634405 | 0.00874999  |
| DECR1    | 3.367203195 | 1.285390818 | 8.820708221 | 0.013476073 |
| DDX56    | 0.654698695 | 0.430095126 | 0.996594372 | 0.048168669 |
| DDX28    | 0.452503636 | 0.269193097 | 0.76064187  | 0.002767607 |
| DCTN3    | 2.046843424 | 1.109705457 | 3.775387401 | 0.021835249 |
| DCTD     | 0.762811643 | 0.595650404 | 0.976884427 | 0.031931021 |
| DCAF6    | 2.001779047 | 1.003790709 | 3.991986893 | 0.048757365 |
| CYP4V2   | 0.647975258 | 0.45340543  | 0.926040818 | 0.017231596 |
| CYB561D2 | 0.348328579 | 0.182058619 | 0.66644908  | 0.001443598 |
| CYB561   | 0.644799681 | 0.441086647 | 0.94259627  | 0.023505254 |
| CX3CR1   | 0.810669017 | 0.672502836 | 0.977221538 | 0.027689509 |
| CTSG     | 1.168192329 | 1.03790669  | 1.314832374 | 0.009976764 |
| CSNK1D   | 2.606936737 | 1.336002623 | 5.086905546 | 0.004965155 |
| CSAD     | 1.784775502 | 1.045713076 | 3.046173626 | 0.033683306 |
| CRISPLD2 | 1.636720159 | 1.022021959 | 2.62113045  | 0.040303366 |
| COX7C    | 0.547987099 | 0.308492533 | 0.973410464 | 0.040179771 |
| CORO1B   | 0.742280758 | 0.558799041 | 0.986008714 | 0.039664588 |
| COQ9     | 0.512740195 | 0.308955515 | 0.850939683 | 0.009752408 |
| COPS7A   | 0.363723513 | 0.148873181 | 0.888640874 | 0.026486665 |
| CHST15   | 1.971224628 | 1.034353672 | 3.75667109  | 0.039148657 |
| CHPT1    | 1.411706096 | 1.014315774 | 1.964786659 | 0.040930113 |
| CHCHD4   | 0.51475475  | 0.303047608 | 0.874359164 | 0.014023326 |
| CETP     | 1.556425202 | 1.068367229 | 2.267440768 | 0.021197536 |
| CES2     | 0.313053662 | 0.141014006 | 0.694984833 | 0.004314607 |
| CELF1    | 1.661760757 | 1.014556335 | 2.721828959 | 0.043657211 |
| CEACAM8  | 1.152005848 | 1.018228641 | 1.303359009 | 0.024653499 |
| CEACAM6  | 1.178416427 | 1.036332105 | 1.339980947 | 0.012267202 |
| CDK1     | 1.301525312 | 1.004802381 | 1.685871939 | 0.045906253 |
| CDC20    | 1.171308722 | 1.011579903 | 1.356258778 | 0.034525273 |
| CD86     | 0.835561146 | 0.704621137 | 0.990833787 | 0.038842239 |
| CD74     | 0.6592093   | 0.488152316 | 0.890207601 | 0.006553221 |
| CD53     | 2.358981824 | 1.274416573 | 4.366543377 | 0.006298404 |
| CD44     | 1.632117249 | 1.13093398  | 2.355404259 | 0.008860853 |
| CD4      | 0.827819436 | 0.689826314 | 0.993416755 | 0.04225956  |

---

---

|          |             |             |             |             |
|----------|-------------|-------------|-------------|-------------|
| CD244    | 0.722643622 | 0.544761271 | 0.95861037  | 0.024248875 |
| CCNB2    | 1.221569281 | 1.045141058 | 1.427780008 | 0.011912103 |
| CCDC93   | 2.594709904 | 1.297680937 | 5.188116193 | 0.006995643 |
| CCDC71   | 0.468536501 | 0.293365036 | 0.74830476  | 0.001504926 |
| CCDC12   | 0.416448235 | 0.192920544 | 0.898966634 | 0.025664201 |
| CBY1     | 0.641377312 | 0.422775624 | 0.973009872 | 0.036740669 |
| CBR1     | 0.580637731 | 0.394794958 | 0.853962717 | 0.005743877 |
| CASP5    | 1.237361808 | 1.005246772 | 1.523073027 | 0.044501697 |
| CARHSP1  | 1.886027402 | 1.076200302 | 3.305239142 | 0.02665641  |
| CARD16   | 1.589599998 | 1.023529771 | 2.468739284 | 0.039064256 |
| CALHM2   | 0.603639661 | 0.386887462 | 0.941826438 | 0.026146284 |
| CACNA2D3 | 0.771192363 | 0.632152453 | 0.940813657 | 0.010423929 |
| CA13     | 1.737049327 | 1.002637065 | 3.00940437  | 0.048912156 |
| C11orf21 | 0.569302124 | 0.401804203 | 0.806623988 | 0.001531042 |
| BST1     | 1.417040495 | 1.026126284 | 1.956877818 | 0.034296401 |
| BRI3     | 1.989682731 | 1.082868251 | 3.655880914 | 0.026660372 |
| BIRC5    | 1.342123694 | 1.052667226 | 1.711173261 | 0.017592775 |
| BIN2     | 1.38774706  | 1.019514325 | 1.888979737 | 0.037268912 |
| BCL6     | 1.400140065 | 1.052537617 | 1.862538849 | 0.02079736  |
| BCL2A1   | 1.549605318 | 1.098955522 | 2.185053529 | 0.012484302 |
| BCAT2    | 0.609071753 | 0.402276878 | 0.922171818 | 0.019139031 |
| BBS4     | 0.662113725 | 0.469860557 | 0.933031253 | 0.018470438 |
| BBS2     | 0.507370134 | 0.302057367 | 0.852236961 | 0.010340891 |
| B9D2     | 1.981145797 | 1.040629311 | 3.771697211 | 0.03741574  |
| AZU1     | 1.163362475 | 1.022267541 | 1.323931548 | 0.021800799 |
| ARL1     | 0.709971406 | 0.507144884 | 0.993915967 | 0.045986561 |
| ARHGAP9  | 2.599547847 | 1.252599945 | 5.394898055 | 0.010330655 |
| ARHGAP17 | 0.373073912 | 0.182734289 | 0.761675021 | 0.006778564 |
| ARG1     | 1.289555983 | 1.040830131 | 1.597719535 | 0.02001829  |
| AQP9     | 2.578916742 | 1.163234524 | 5.717515624 | 0.01969056  |
| APOL3    | 0.705071395 | 0.512901344 | 0.969242286 | 0.031367239 |
| APEH     | 0.341057517 | 0.167464779 | 0.694595189 | 0.003035113 |
| APBB1IP  | 1.971038858 | 1.068611438 | 3.635553619 | 0.029824286 |
| ANTXR2   | 3.958787785 | 1.946914742 | 8.049659488 | 0.00014473  |
| ANLN     | 1.330413756 | 1.052051103 | 1.682428503 | 0.017143422 |
| ANKRD55  | 1.291297852 | 1.067519754 | 1.561985279 | 0.008466748 |
| ALKBH7   | 0.580660014 | 0.343579981 | 0.981332063 | 0.042321059 |
| AIMP2    | 0.65848911  | 0.454412549 | 0.954216402 | 0.027273187 |
| AGER     | 1.639465596 | 1.033828732 | 2.599896247 | 0.035607776 |
| ADRB2    | 0.597122108 | 0.380044876 | 0.93819134  | 0.025304491 |
| ADAT3    | 0.561106579 | 0.33533869  | 0.93887345  | 0.027798543 |
| ADAMTS15 | 1.731549448 | 1.007369144 | 2.976330482 | 0.046974471 |
| ACOT9    | 1.941914588 | 1.149833354 | 3.279633743 | 0.013060005 |
| ABHD10   | 0.593305777 | 0.391783605 | 0.898485135 | 0.013681573 |

---

---

|          |             |             |             |             |
|----------|-------------|-------------|-------------|-------------|
| ABCC11   | 1.971694063 | 1.058592534 | 3.672402131 | 0.03240328  |
| AASDHPPT | 0.44178789  | 0.235427803 | 0.829029272 | 0.010964809 |

---

**Table. S2** Basic clinical information of patients in this study, including CDI.

| sample | group     | CDI         | Neutrophil<br>Percentage (%) | Lymphocyte<br>percentage (%) |
|--------|-----------|-------------|------------------------------|------------------------------|
| 1      | URTI      | 0           | 54.7                         | 25.6                         |
| 2      | URTI      | 0.01213491  | 58.1                         | 25                           |
| 3      | URTI      | 0.160827129 | 75.4                         | 16.3                         |
| 4      | URTI      | 0.278161838 | 53.7                         | 37.1                         |
| 5      | URTI      | 0.391892038 | 67.9                         | 21.6                         |
| 6      | URTI      | 0.510217257 | 76                           | 16.1                         |
| 7      | pneumonia | 0.497093027 | 61.8                         | 29                           |
| 8      | pneumonia | 0.524462712 | 65.4                         | 25.4                         |
| 9      | pneumonia | 0.54700912  | 75.2                         | 8.2                          |
| 10     | pneumonia | 0.555064785 | 87.3                         | 6.7                          |
| 11     | pneumonia | 0.568615934 | 87.3                         | 6.7                          |
| 12     | pneumonia | 0.585401864 | 81.5                         | 13.9                         |
| 13     | pneumonia | 0.684154166 | 61.8                         | 26.9                         |
| 14     | pneumonia | 0.709309832 | 91.3                         | 5.1                          |
| 15     | pneumonia | 0.731770378 | 72.9                         | 15.5                         |
| 16     | pneumonia | 0.840514975 | 74.5                         | 11.7                         |
| 17     | pneumonia | 1.023990808 | 92.4                         | 5.2                          |
| 18     | sepsis    | 0.536345402 | 91.6                         | 5.4                          |
| 19     | sepsis    | 0.645832234 | 97.3                         | 0.7                          |
| 20     | sepsis    | 0.686413371 | 82.9                         | 10.5                         |
| 21     | sepsis    | 0.689717665 | 93.2                         | 4.4                          |
| 22     | sepsis    | 0.831031902 | 91.6                         | 3.6                          |
| 23     | sepsis    | 0.833323425 | 90.8                         | 5.6                          |
| 24     | sepsis    | 0.88636221  | 92.1                         | 3.5                          |
| 25     | sepsis    | 1           | 83.2                         | 12.2                         |

**Table. S3** Primers used in this study.

|           | Primer                  |
|-----------|-------------------------|
| H-PDZD8-F | GATCATCAAGCGCAAGCACA    |
| H-PDZD8-R | AGACGGCCTTCAGTAAGTGC    |
| M-PDZD8-F | GCAAGTCCGCCTACCTGTTC    |
| M-PDZD8-R | CACCTCGAAGTCAATCAGCG    |
| H-ADRB2-F | TTGCCTCTTCATCGTGTCC     |
| H-ADRB2-R | CCACCTGGCTAAGGTTCTGG    |
| M-ADRB2-F | ATGTCGGTTATCGTCCTGGC    |
| M-ADRB2-R | GGTTTGTAGTCGCTCGAACTTG  |
| H-GAPDH-F | GGAGCGAGATCCCTCCAAAAT   |
| H-GAPDH-R | GGCTGTTGTCATACTTCTCATGG |
| M-GAPDH-F | AGGTCGGTGTGAACGGATTTG   |
| M-GAPDH-R | TGTAGACCATGTAGTTGAGGTCA |

**Table. S4** qRT-PCR Results in clinical samples

| sample | group     | PDZD8       | ADRB2       |
|--------|-----------|-------------|-------------|
| 1      | URTI      | 0.766865048 | 1.484869298 |
| 2      | URTI      | 1.019162003 | 1.733572014 |
| 3      | URTI      | 1.185852939 | 1.489733005 |
| 4      | URTI      | 0.91186394  | 0.840975596 |
| 5      | URTI      | 0.890659549 | 0.487136175 |
| 6      | URTI      | 1.328511223 | 0.636542889 |
| 7      | pneumonia | 1.17681408  | 0.503916087 |
| 8      | pneumonia | 1.129073607 | 0.370782792 |
| 9      | pneumonia | 1.823537417 | 1.086850131 |
| 10     | pneumonia | 1.050810758 | 0.193924021 |
| 11     | pneumonia | 1.26251694  | 0.392840639 |
| 12     | pneumonia | 1.345536153 | 0.437559714 |
| 13     | pneumonia | 1.824747012 | 0.690297201 |
| 14     | pneumonia | 1.66023596  | 0.432185146 |
| 15     | pneumonia | 1.648765731 | 0.354110372 |
| 16     | pneumonia | 2.367004584 | 0.846835547 |
| 17     | pneumonia | 2.365413577 | 0.312706451 |
| 18     | sepsis    | 0.990694009 | 0.180586948 |
| 19     | sepsis    | 1.391485178 | 0.313933075 |
| 20     | sepsis    | 1.416398634 | 0.224225772 |
| 21     | sepsis    | 1.62267462  | 0.446762097 |
| 22     | sepsis    | 1.845596723 | 0.287606868 |
| 23     | sepsis    | 1.680456512 | 0.095125084 |
| 24     | sepsis    | 2.086926399 | 0.398640463 |
| 25     | sepsis    | 2.229544299 | 0.229419233 |

**Table. S5** qRT-PCR Results of animal experiment.

| sample | group | PDZD8    | ADRB2    |
|--------|-------|----------|----------|
| S1     | Sham  | 0.934586 | 0.890679 |
| S2     | Sham  | 0.999706 | 1.006501 |
| S3     | Sham  | 1.070307 | 1.115487 |
| C1     | CLP   | 3.199039 | 0.436866 |
| C2     | CLP   | 4.891412 | 0.381115 |
| C3     | CLP   | 5.41263  | 0.391906 |
| N1     | Nec-1 | 0.379315 | 0.238737 |
| N2     | Nec-1 | 0.332926 | 0.337599 |
| N3     | Nec-1 | 0.221405 | 0.106116 |

**Table. S6** Elisa results in clinical samples

| sample | group     | HMGB1      | CAPS8   |
|--------|-----------|------------|---------|
| 1      | Control   | 733.54     | 9.68    |
| 2      | Control   | 2492.32    | 80.93   |
| 3      | Control   | 3489.62    | 43.12   |
| 4      | Control   | 1775.7     | 51.5    |
| 5      | Control   | 4504.9     | 68.3    |
| 6      | Control   | 1989.99    | 76.72   |
| 7      | Control   | 2149.64    | 118.96  |
| 8      | Control   | 1902.61    | 93.59   |
| 9      | pneumonia | 7956.85    | 413.5   |
| 10     | pneumonia | 12196.55   | 247.32  |
| 11     | pneumonia | 4897.25    | 1417.52 |
| 12     | pneumonia | 9391.15    | 72.51   |
| 13     | pneumonia | 3939.15    | 303.71  |
| 14     | pneumonia | 4396.52614 | 399.94  |
| 15     | pneumonia | 4788.10556 | 195.62  |
| 16     | sepsis    | 20473.3    | 458.85  |
| 17     | sepsis    | 15099.9    | 242.79  |
| 18     | sepsis    | 23940.5    | 1737.99 |
| 19     | sepsis    | 22214.3    | 116.79  |
| 20     | sepsis    | 18201.5    | 204.9   |
| 21     | sepsis    | 14635.6    | 91.68   |
| 22     | sepsis    | 17531.3    | 1042.23 |
| 23     | sepsis    | 7379.8954  | 383.6   |

**Table. S7** Elisa results of animal experiment

| sample | group | IL-1 $\beta$ | IL-6     |
|--------|-------|--------------|----------|
| S1     | Sham  | 38.9461      | 5.3393   |
| S2     | Sham  | 39.59618     | 7.4288   |
| S3     | Sham  | 39.59618     | 10.56565 |
| C1     | CLP   | 194.7138     | 4879.438 |
| C2     | CLP   | 93.15004     | 1971.857 |
| C3     | CLP   | 261.737      | 1797.874 |
| N1     | Nec-1 | 75.04546     | 1650.169 |
| N2     | Nec-1 | 92.44501     | 144.1304 |
| N3     | Nec-1 | 59.42184     | 60.12475 |

**Table. S8** R packages used

| algorithms                             | R package               |
|----------------------------------------|-------------------------|
| LASSO-Cox                              | glmnet                  |
| Random Forest                          | randomForest            |
| XGBoost algorithm                      | XGBoost                 |
| ROC                                    | pROC/ timeROC           |
| survival curves                        | survminer               |
| multivariate logistic regression       | autoReg                 |
| Decision Curve Analysis                | Rmda                    |
| Differentially Expressed Gene Analysis | limma                   |
| GO enrichment analysis                 | clusterProfiler/ msigdb |
| ssgsea                                 | GSVA                    |
| Correlation analysis                   | stats                   |
| Immunohistochemical Analysis           | CIBERSORT               |
| GSEA                                   | fgsea                   |
